# Supplementary material
Source: PubMed Central journal article supplement (PMC7275736)
Supplement: pnas.1914373117.sapp.pdf [file pnas.1914373117.sapp.pdf]

# PNAS

www.pnas.org

Supplementary Information for

## Genomic evidence for convergent evolution of gene clusters for momilactone biosynthesis in land plants

Lingfeng Mao,<sup>‡, 1</sup> Hiroshi Kawaide,<sup>‡, 2</sup> Toshiya Higuchi,<sup>‡, 3</sup> Meihong Chen,<sup>1</sup> Koji Miyamoto,<sup>4</sup> Yoshiki Hirata,<sup>2</sup> Honoka Kimura,<sup>2</sup> Sho Miyazaki,<sup>2</sup> Miyu Teruya,<sup>3</sup> Kaoru Fujiwara,<sup>3</sup> Keisuke Tomita,<sup>3</sup> Hisakazu Yamane,<sup>4</sup> Ken-ichiro Hayashi,<sup>5</sup> Hideaki Nojiri,<sup>3</sup> Lei Jia,<sup>1</sup> Jie Qiu,<sup>1</sup> Chuyu Ye,<sup>1</sup> Michael P. Timko<sup>6</sup>, Longjiang Fan<sup>\*,1</sup>, and Kazunori Okada<sup>\*,3</sup>

<sup>1</sup>Institute of Crop Sciences & Institute of Bioinformatics, College of Agriculture and Biotechnology, Zhejiang University, Hangzhou, China; <sup>2</sup>Graduate school of Agriculture, Tokyo University of Agriculture and Technology, Tokyo, Japan; <sup>3</sup>Biotechnology Research Center, The University of Tokyo, Tokyo, Japan; <sup>4</sup>Teikyo University, Department of Biosciences, Tochigi, Japan; <sup>5</sup>Okayama University of Science, Department of Biochemistry, Okayama, Japan; <sup>6</sup> Department of Biology, University of Virginia, Charlottesville, Virginia, USA

<sup>‡</sup> These authors contributed equally to this work.

\*Corresponding authors

\* Kazunori Okada

**Email:** [ukazokad@mail.ecc.u-tokyo.ac.jp](mailto:ukazokad@mail.ecc.u-tokyo.ac.jp)

\*Longjiang Fan.

**Email:** [fanlj@zju.edu.cn](mailto:fanlj@zju.edu.cn)

### This PDF file includes:

SI Materials and Methods  
SI Appendix Figures S1 to S13  
SI Tables S1 to S7  
SI References

## SI Materials and Methods

### **De novo genome assembly**

MaSuRCA assembler version 3.2.2 (1) was used for our hybrid assembly. Clean Illumina data filtered by NGSQC v2.3.3 (2) with default settings and raw Pacbio data were used to improve the raw assembly in two rounds with SSPACE v1.0 (3), PBJelly (4), and Gapfiller (5) (Table S3). The assembly was polished using Pilon v1.23 (4, 6) with all clean Illumina data at the last step. Meanwhile, we also constructed assembly-only based Illumina data using Soapdenovo2 (7) to improve our hybrid assembly. In the target region containing candidate momilactone gene cluster, Illumina-only assembly exhibited a scaffold, whereas it exhibited two scaffolds in the hybrid assembly. Finally, we merged the two scaffolds from the hybrid assembly according the synteny relationship between the two assemblies. Furthermore, we confirmed the link between the two scaffolds using PCR and Sanger sequencing (Table S5a).

### **Genome annotation**

To annotate repeat elements in the assembly, we first built a *de novo* repeat library using RepeatModeler (8) and predicted repetitive elements of *C. plumiforme* genome using RepeatMasker 4.0.8 (8) with default settings. *ab initio* gene structure predictions were performed using AUGUSTUS 3.2.2 (9), GeneMark.hmm (10), and FGENESH 2.6 (11). Homology evidence for gene structure was searched against the coding sequences of moss *P. patens* v3.3 (reference 17 in the main text) and liverwort *Marchantia polymorpha* v3.1 (reference 23 in the main text) using gmap (12). RNA-seq data from our previous study (reference 5 in the main text) were aligned and the RNA-seq reads were assembled using Tophat 2.1.1 (13), Cufflinks 2.2.1 (14), and Trinity 2.4.0 (15) with default settings. The assembled transcripts from Cufflinks (reference-based) and Trinity (reference-free) were merged for the final transcriptome evidence using PASA 2.0.2 (16). Finally, all the evidence to support gene models were integrated to generate the combined gene set using EVM (15) with higher weight in the evidence of RNA-seq results.

**Phylogenetic tree and divergence time estimation.** Monophyletic constraints were imposed for the nodes, which were used to calibrate the evolutionary rates (BLOSUM62 and an uncorrelated exponential relaxed model). A Yule speciation process which specifies a constant rate of species divergence was used. Normal priors for land plants–vascular plants split time (mean: 540 mya, std dev: 6.0), gymnosperm–angiosperm split time (mean: 313 mya, std dev: 6.0), monocot–dicot split time (mean: 150.0 mya, std dev: 4.0), and *O. sativa*–*E. crus-galli* split time (mean: 40.0 mya, std dev: 3.0), were used. The MCMC chains in BEAST were run for 10,000,000 generations while sampling at every 1,000 steps. Convergence between the runs and the amount of burn-in (throwing away some iterations at the beginning of an MCMC run) was determined using Tracer v1.10.4, which was used to assess the effective sample size and to check the consistency of the results. The tree was drawn with FigTree v1.4 (17).

The primary coding sequences (CDS) and protein sequence of *P. patens* and *C. plumiforme* were used to BLAST against each other, the genes with mutual best BLAST hits between them were selected to calculate nonsynonymous ( $K_a$ ) and synonymous ( $K_s$ ) substitution rates using KaKs\_calculator v2.0 with GMYN model (18). The  $K_s$  distribution between *P. patens* and *C. plumiforme* was plotted using ggplot2 (19) and  $K_s$  was applied to observe the historical genome duplication of *C. plumiforme*.

### **Identification of candidate momilactone gene cluster in the plant kingdom**

Genome annotated genes of 107 plants were downloaded from Phytozome 12.0 (phytozome.jgi.doe.gov), Ensemble plants (www.plants.ensembl.org/), and other projects (reference 16 in the main text, 20). We first identified the clustered genes through Pfam domains (PF01397 and PF03936 for *TPS* genes; PF00067 for P450; PF13561, PF00106, and PF08659 for *SDR* genes) using pfamscan (SI Appendix, Fig. S7). Based on the three types of genes identified above, we scanned the genomes of the 107 plants with a 100 kb window size using in-house scripts to find the candidate regions where the three types of genes co-existed. Adjacent windows containing the three types of genes would be merged. As a control, all known momilactone gene clusters in *Oryza* species and barnyard grass (references 8 and 16 in the main text) must be successfully identified.

### RNA extraction and quantitative RT-PCR

For the stress treatment, the *C. plumiforme* gametophores were incubated with BCDATG liquid media (reference 37 in the main text) containing 0.5 mg/mL chitosan (chitosan oligosaccharide lactate from Aldrich, Japan, was dissolved in water by the addition of acetic acid, and the final pH of the solution was adjusted to pH 6.0.) or 0.5 mM aqueous solution of copper (II) chloride dihydrate (Nacalai Tesque, Japan). Total RNA was extracted from the *C. plumiforme* gametophores treated with each of the elicitors at regular time intervals using Sepasol (Nacalai Tesque) and subjected to cDNA synthesis using a PrimeScript RT reagent Kit with gDNA Eraser (Takara Bio, Japan). Quantitative RT-PCR (qRT-PCR) was performed using a Power SYBR Green PCR Master Mix (Applied Biosystems, CA, USA) for the *CpDTC1/HpDTC1*, *CpMAS*, *CpCYP970A14*, *CpCYP964A1*, and *CpACT3* genes on an ABI 7500 Fast Real-Time PCR System (Applied Biosystems) with the standard mode according to a previous report (reference 9 in the main text). For each sample, the mean value from triplicate amplifications was used to calculate the transcript abundance. The  $2^{-\Delta\Delta CT}$  method was used for a relative quantification of fold changes of the target genes at inductive condition compared to non-treated condition. Sequences of PCR primers used for qRT-PCR analysis are provided in *SI Appendix*, Table S5b.

### Functional identification of *CpMAS*

The full - length cDNA of *CpMAS* was amplified by end - to - end RT - PCR using Ex Taq (Takara, Japan) with the following oligonucleotide as primers: *CpMAS* - full - F, 5' - ATGGCGTCAGGGAAAGAAGC-3' ; *CpMAS* - full - R, 5' -CGGTCACCAAGTGAAATGGA-3' . The amplified *CpMAS* cDNA was cloned into pT7Blue T-vector (Invitrogen, <http://www.invitrogen.com/>) to generate pT7 - *CpMAS*, and the sequence was confirmed. For functional analysis, the cDNA fragment including *CpMAS* orf was prepared by restriction enzyme digestion in BamHI and SpeI sites, then the purified fragment was inserted into the same sites of pQE31 vector (Qiagen) to yield pQE-*CpMAS*. The construct was transformed into *E. coli* JM109. This strain was precultured for 18 h at 37°C in 2 mL of LB medium containing ampicillin (50 µg/mL), and then cultured at 37 °C in 800 mL of LB medium containing ampicillin until the exponential growth phase. Recombinant protein expression was induced by adding isopropyl β-D-thiogalactopyranoside (1 mM) and successively cultured for 18 h at 30 °C. Recombinant proteins were affinity-purified using HisTrap HP column according to the manufacturer's instruction (GE Healthcare Life Sciences). For functional analyses, 100 µL of reaction mixtures containing 0.4 µM of each recombinant protein, 0.2 M 2-amino-2-(hydroxymethyl)-1,3-propanediol (Tris)-HCl (pH 8.0), 10 mM 2-mercaptoethanol, 1 mM NAD<sup>+</sup>, and 1 µg of 3β-hydroxy-9βH-pimara-7,15-dien-19,6β-olide were prepared. After incubation at 30 °C for 40 min, the mixtures were extracted with ethyl acetate, and the extract was evaporated to dryness *in vacuo*. The residue was dissolved in 100 µL of methanol and subjected to GC-MS and LC-MSMS analysis as described previously (reference 8 in the main text).

### Biotransformation of 3OH-*syn*-pimaradienolide in fission yeast

Log-phase culture of *Schizosaccharomyces pombe* L972 was diluted in a fresh YES medium (0.5% yeast extract, 3% glucose, 225 mg/L adenine, 225 mg/L uracil, 225 mg/L leucine, 225 mg/L histidine, and 225 mg/L lysine) to the optical density at 600 nm of 0.1 and then incubated for 48 h at 30 °C with 5 µM 3OH-*syn*-pimaradienolide. The cell culture was extracted with ethyl acetate, and the extract was evaporated *in vacuo*. The residue was dissolved in methanol and subjected to LC-MSMS analysis as previously described (reference 8 in the main text).

### Functional identification of *CpCYP970A14* and *CpCYP964A1* using both yeast and *N. benthamiana* systems.

Based on the sequence data, the open reading frames of unigene12783 (*CpCYP964A1*) and unigene16484 (*CpCYP970A14*) were amplified from a *C. plumiforme* cDNA library reported previously (reference 9 in the text) using gene-specific primers which introduced restriction enzyme cleavage sites at the 3' - and 5' -ends: unigene12783-fwd (underlined as KpnI site): 5' - AGGTACCATGGACCCGTTGCTGGG-3' , unigene12783-rev (underlined as NotI site): 5' -

AGCGGCCGCAATTGACATATGCTCCTCTTCTG-3' , unigene16484-fwd (underlined as EcoRI site): 5' -GAATTCATGGAGCTCTCTGTCTGG-3' , unigene16484-rev (underlined as NotI site): 5' -GCGGCCGCAAGCTGAAGTCTTGTATACATCC-3' . The *CpCYP970A14* and *CpCYP964A1* amplicons were ligated into pPICZA (Thermo Fisher) and the recombinant constructs introduced into *Pichia* strain X-33 harboring the *ATR1* gene that enhances CYP reductase activity (21) according to manufacturer's protocols. Transformants were then selected on YPDS plates. The coding region of *CYP99A3* was also amplified by PCR with the gene-specific primers CYP99A3-F (underlined as EcoRI site): 5' -GGAATTCATGTGGAGATAAACTCAGAAG-3' , and CYP99A3-R (underlined as KpnI site): 5' -GGGGTACCACTTTGCATGGAAATCG-3' , then cloned into the pPICZA vector and to transform *Pichia* strain X-33 in the same manner as described above.

For *N. benthamiana* expression system, *CpCYP970A14* and *CpCYP964A1* cDNAs were amplified by PCR using gene-specific primers (*CpCYP970A14*: Forward primer 5' -TTCTGCCCAAATTCGATGGAGCTCTCTGTCTGG-3' , and Reverse primer 5' -GTGATGGTGATGCCAGCTGAAGTCTTGTATACATC-3' . *CpCYP964A1*: Forward primer 5' -TTCTGCCCAAATTCGATGGACCCGTTGCTGGGC-3' , and Reverse primer 5' -GTGATGGTGATGCCATTGACATATGCTCCTCTTC-3' ; underlines indicate 15 base pairs vector arm sequences either up and down stream at NruI or SmaI sites. In each gene, reverse primers were designed to truncate termination codon) and amplified fragments were cloned into NruI-SmaI double digested site of pEAQ-HT vectors by In-fusion cloning to express as C-terminal histidine-tagged enzymes. The resulting plasmids pEAQ-HT-*CpCYP970A14* and pEAQ-HT-*CpCYP964A1* were introduced into *Agrobacterium tumefaciens* LB4404 and used for agroinfiltration.

For functional analysis, the various *Pichia* transformants were cultured for 72 h in 50 mL of a minimal medium using methanol as a carbon source. The culture was started then methanol was added to a final concentration of 0.5% (v/v) every 24 h of the culture. The substrate, *syn*-pimara-7,15-diene (7 µg dissolved in methanol), was added to the culture medium 24 h after the start of culture and converted *in vivo*. After culturing for 72 h, 50 mL of ethyl acetate was added to the culture solution and stirred vigorously. The ethyl acetate layer was recovered by centrifugation (4000 rpm, 25°C, 5 min). This extraction procedure was performed twice. The ethyl acetate layers were combined and concentrated *in vacuo*. The ethyl acetate extracts were derivatized with diazomethane to form methyl ester derivatives and analyzed by GC-MS (GCMSD 5975 Series, Agilent Technologies, Santa Clara, CA, USA). GC and MS analytical conditions were previously described (21, 22).

In the *N. benthamiana* expression system, 3-week-old *N. benthamiana* grown in a plant incubator (23°C, 16 h light/8 h dark photoperiod) was used. After agroinfiltration, the plants were further grown for five days under same condition, following which 4~5 pieces of the leaves were frozen in liquid nitrogen and homogenized with multi-beads shocker (Yasui Kikai, Osaka, Japan). The homogenized samples were extracted with 80% (v/v) methanol containing 5% (v/v) formic acid or hexane as extraction solutions. Purification steps were as described by Miyazaki et al. (23). The methanol eluents were concentrated *in vacuo* and derivatized with diazomethane to form methyl ester derivatives then analyzed by GC-MS (GCQ1000-K9, JEOL, Tokyo, Japan). The conditions of the GC-MS analysis were previously described (21, 22).

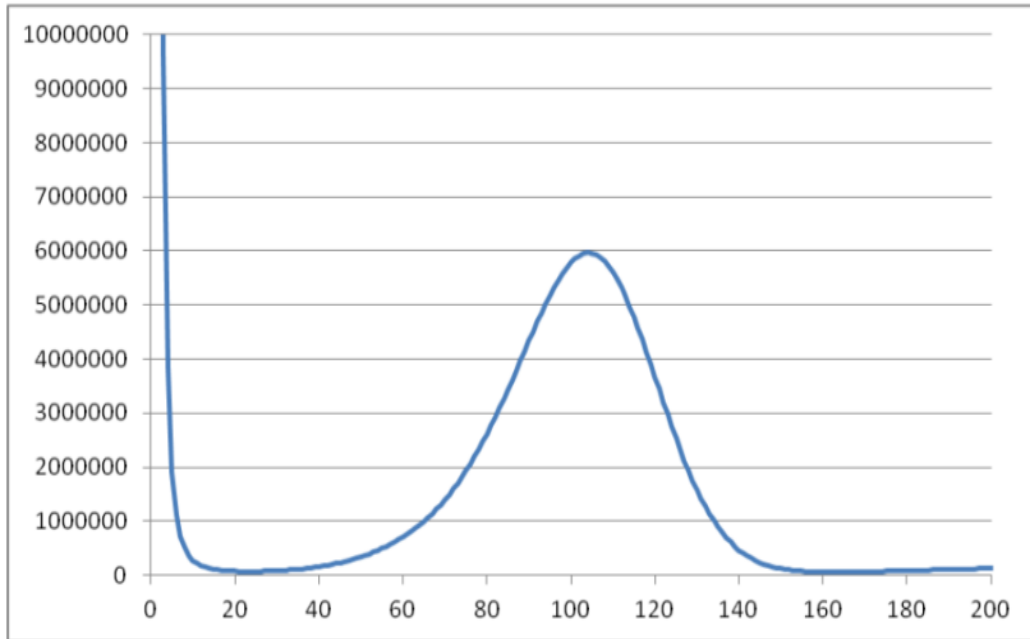

|                      |             |
|----------------------|-------------|
| Estimate Genome size | 434,417,786 |
|----------------------|-------------|

**SI Appendix Fig. S1.** Genomic survey of *C. plumiforme*. K-mer distribution: X-depth of K-mer; Y-number of K-mer

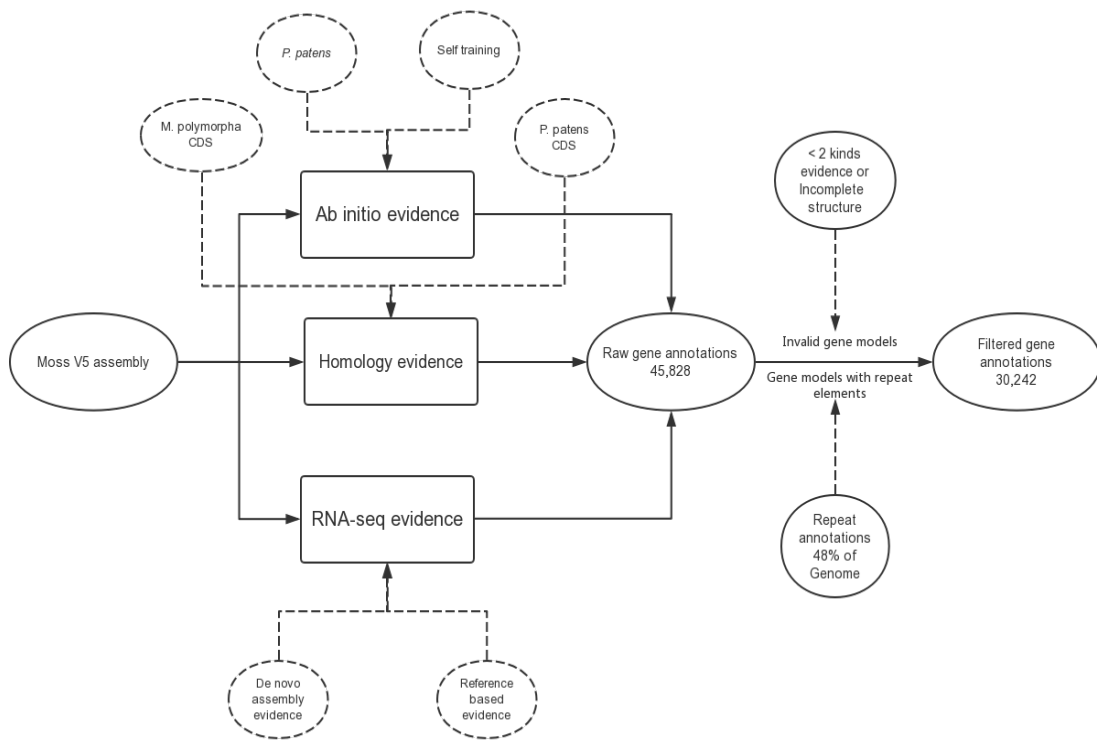

**SI Appendix Fig. S2.** Gene annotation strategy and results of *C. plumiforme*

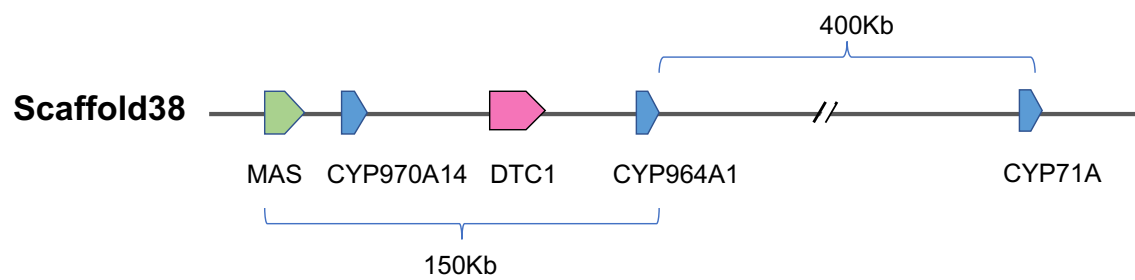

**SI Appendix Fig. S3.** Illustration of Scaffold38

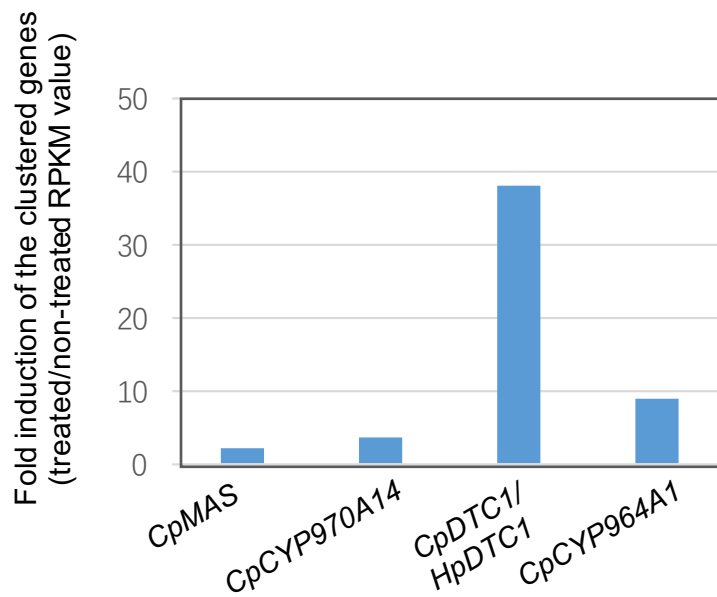

**SI Appendix Fig. S4.** Inductive expression levels of the clustered genes after  $\text{CuCl}_2$  treatment shown as calculated RPKM values from RNA-seq data. *CpMAS*: Unigene\_5051, LC494432; *CpCYP970A14*: Unigene\_16484, LC494433; *CpDTC1/HpDTC1*: LC128408; *CpCYP964A1*: Unigene\_12783, LC494434.



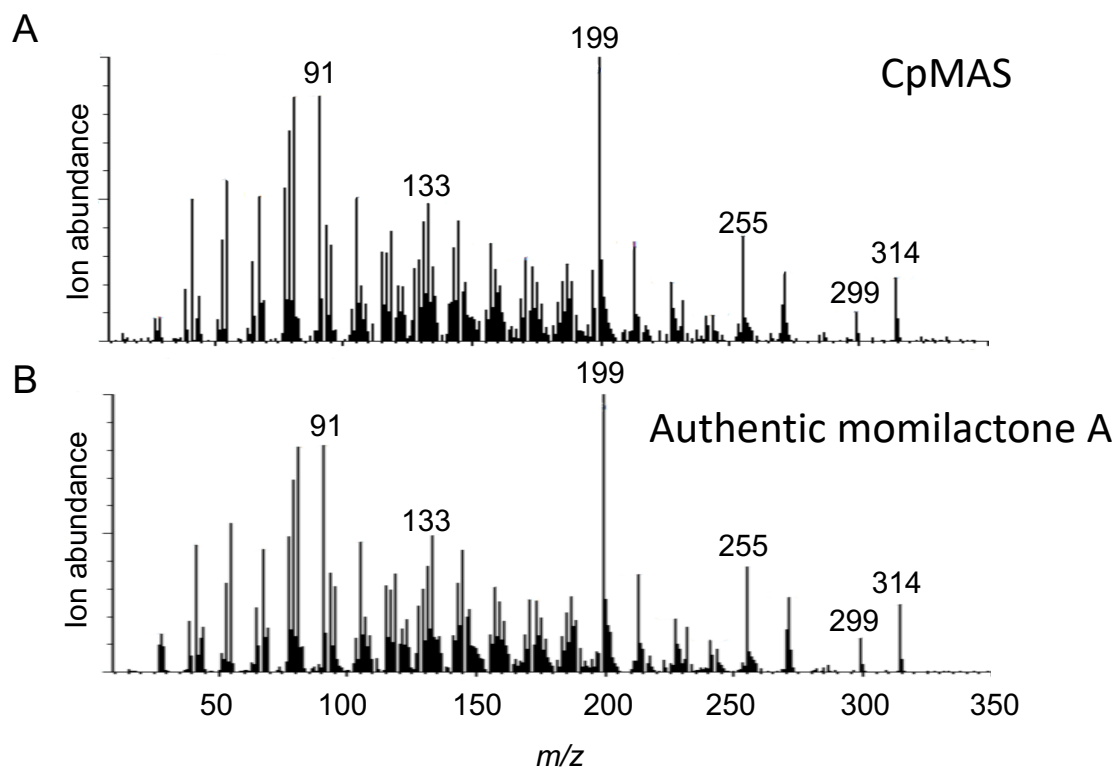

**SI Appendix Fig. S5.** GC-MS analysis of momilactone A in the enzymatic reaction. Mass spectra of the CpMAS reaction products (A) and authentic momilactone A (B) shown in figure 3B.

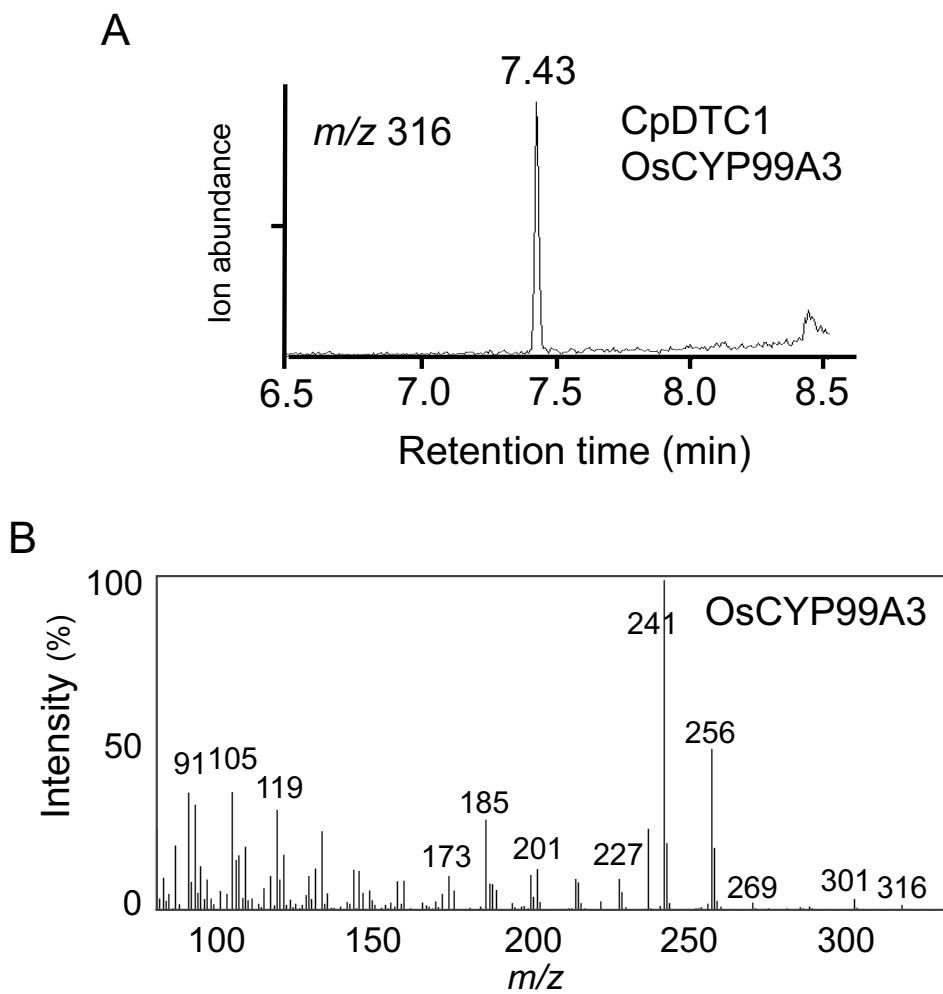

**SI Appendix Fig. S6.** GC-MS analysis of product catalyzed by rice CYP99A3 in *N. benthamiana*. (A) Total ion chromatogram (scanned on  $m/z$  316) of reaction product methyl ester derivative of methanol extract from *N. benthaminana* leaves expressing both CpDTC1 and rice CYP99A3. (B) Mass spectrum of the peak on GC at 7.43 min.

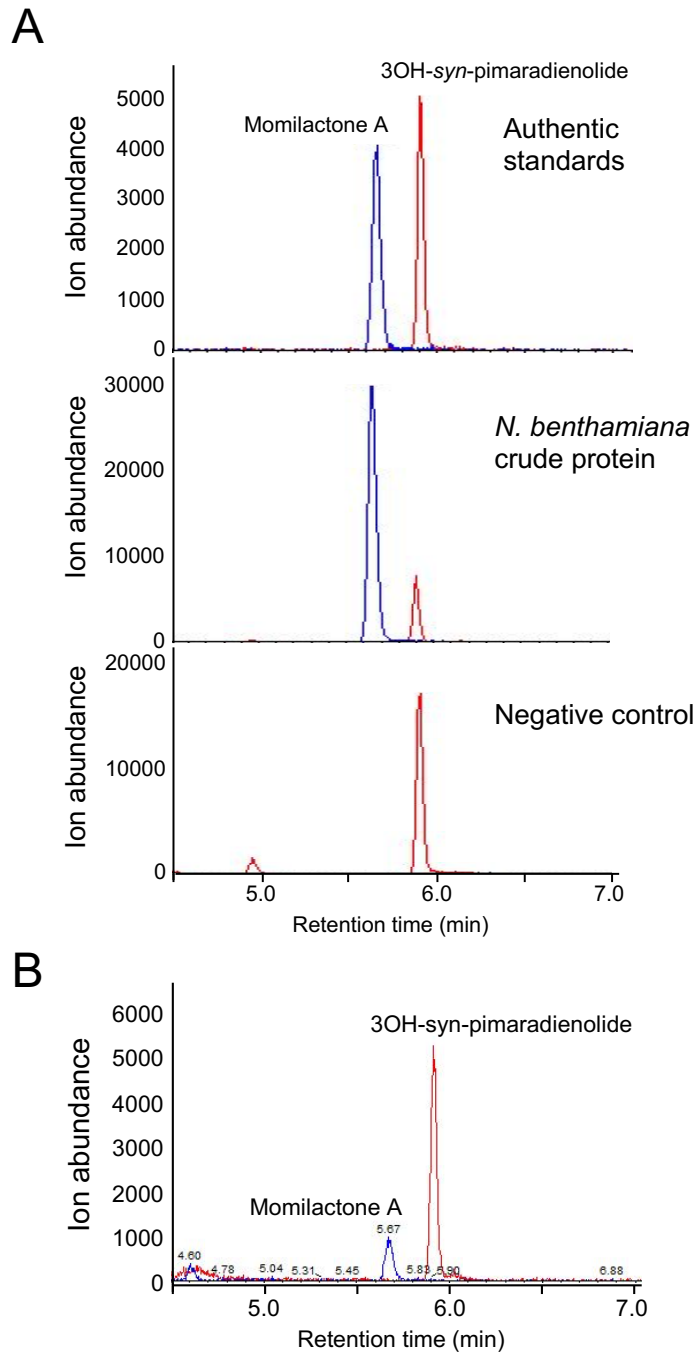

**SI Appendix Fig. S7.** (A) Momilactone A [6] converted from the substrate 3 $\beta$ -hydroxy-9 $\beta$ H-pimara-7,15-dien-19,6 $\beta$ -olide [5] by crude protein from *N. benthamiana* leaves is analyzed by LC-MS/MS. Upper panel, authentic standards; middle panel, product catalyzed by *N. benthamiana* crude protein (0.1 mg) at 33°C for 24h; lower panel, negative control without enzyme. (B) *In planta* conversion of 3OH-syn-pimaradienolide to momilactone A in *N. benthamiana* feeding assay. Approximately 1  $\mu$ g of 3OH-syn-pimaradienolide was injected into one leaf of *N. benthamiana*.

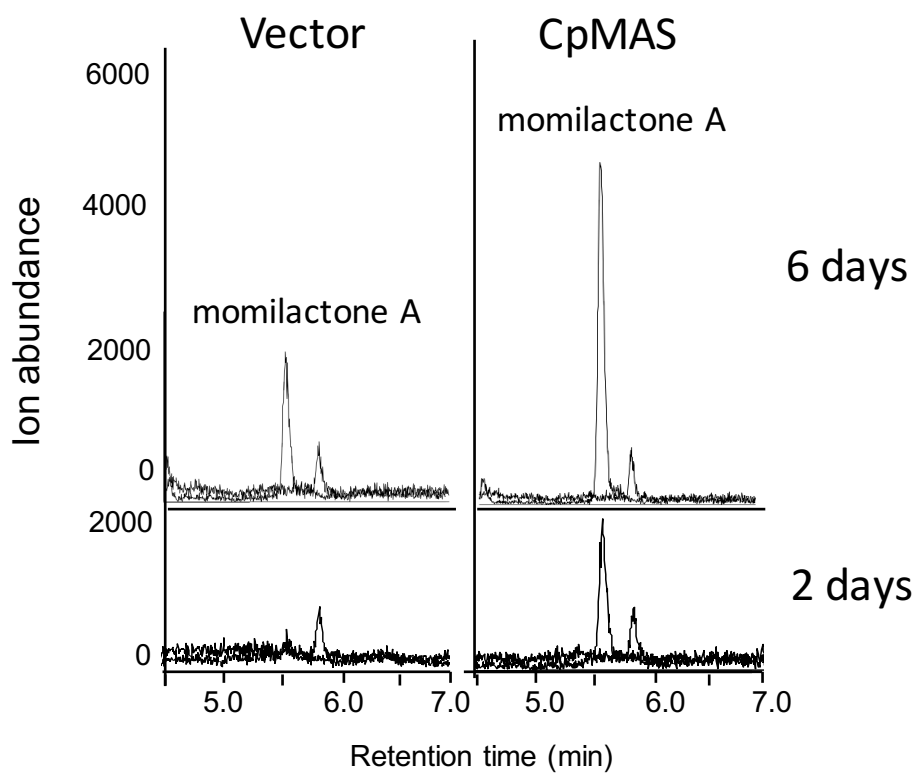

**SI Appendix Fig. S8.** Enhanced production of momilactone A in the *N. benthamiana* leaves expressing CpMAS with feeding of 3OH-pimaradienolide. Reaction products from the leaves harvested 2 days and 6 days after the infiltration are analyzed by LC-MS/MS. Approximately 1  $\mu\text{g}$  of 3OH-*syn*-pimaradienolide was injected into one leaf of *N. benthamiana*.

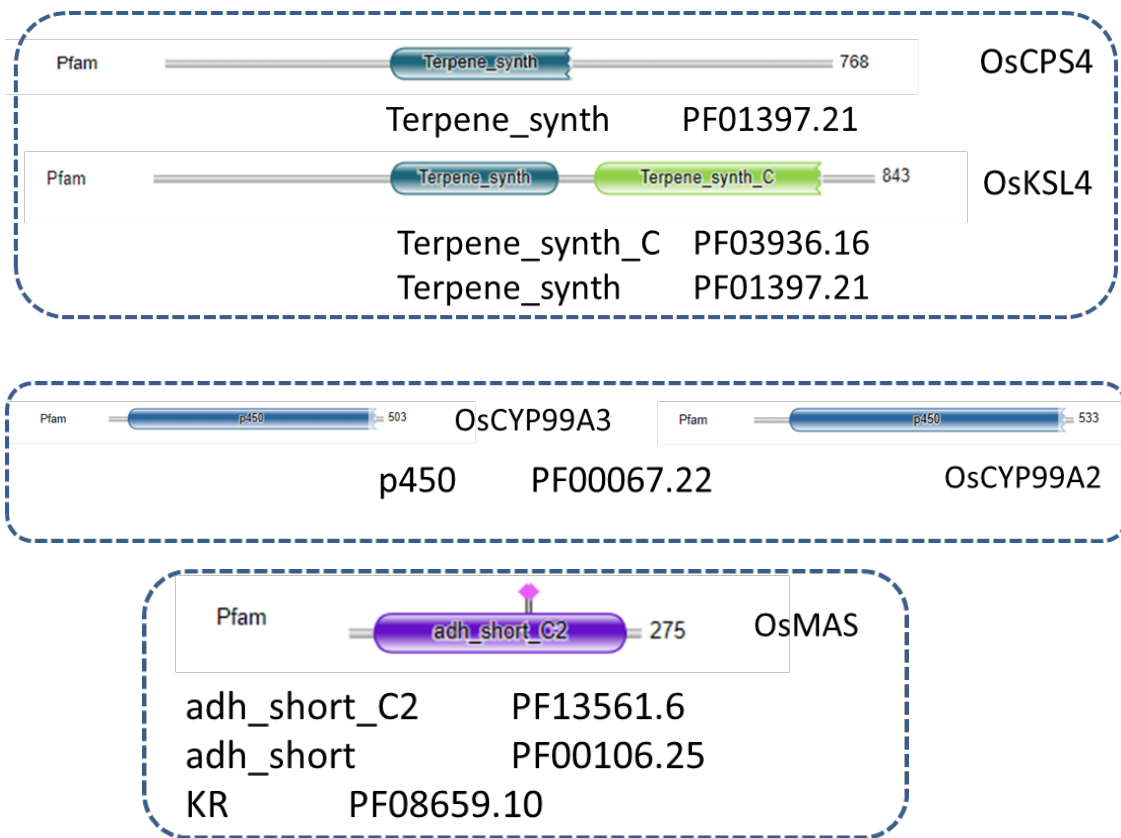

**SI Appendix Fig. S9.** Domains of terpene synthase (TPS), cytochrome P450 monooxygenase (P450) and momilactone A synthase (MAS)

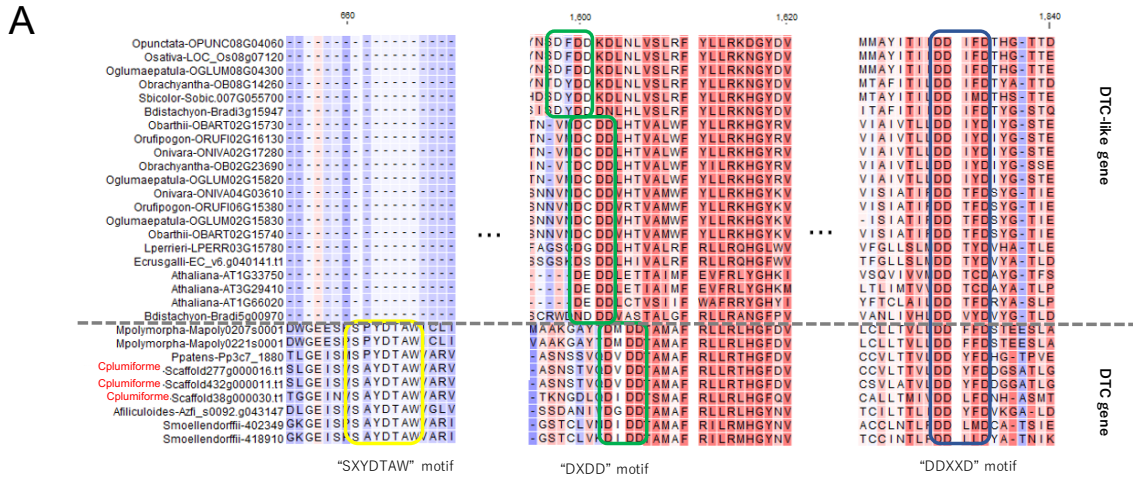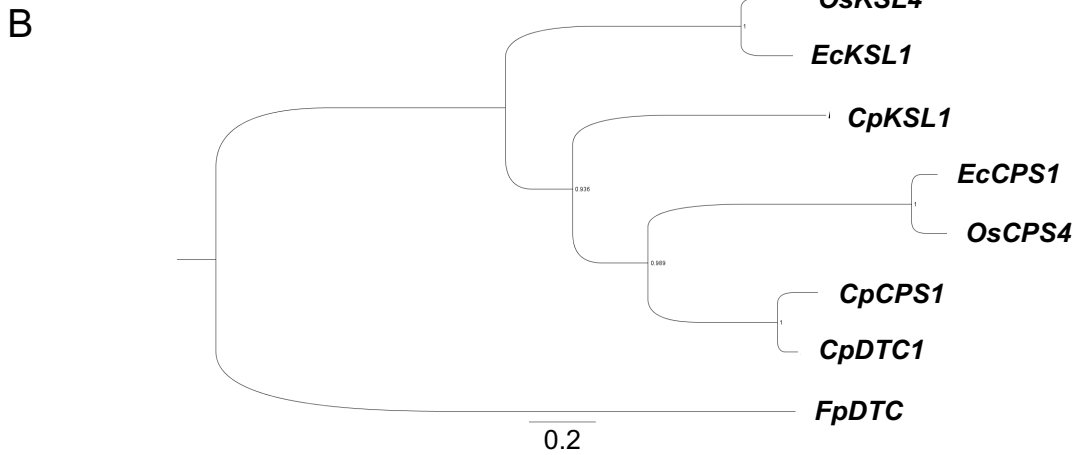

**SI Appendix Fig. S10.** Evolution of momilactone biosynthesis-related terpene synthase (TPS) genes in plants. (A) Sequence alignment of two types of TPS genes (DTC and DTC-like) with the three functional motifs ("DXDD", "DDXXD" and "SX YDTAW") in plants. DTC-like TPS genes have "DXDD" motif but its "DXDD" motif do not locate at the typical position. "SX YDTAW" motif is not found in DTC-like TPS. (B) Phylogenetic tree of momilactone gene cluster-related TPS genes in the momilactone gene clusters in three plants species (*Os*, *Ec* and *Cp*). The ortholog (accession number: CAP74389.1) from the fungus *Fusarium proliferatum* was used as outgroup. In addition to the terpene gene *CpDTC1/HpDTC1* in the cluster, two other terpene genes (*CpCPS* and *CpKSL*) in the *Calophyllum* genome were also included.

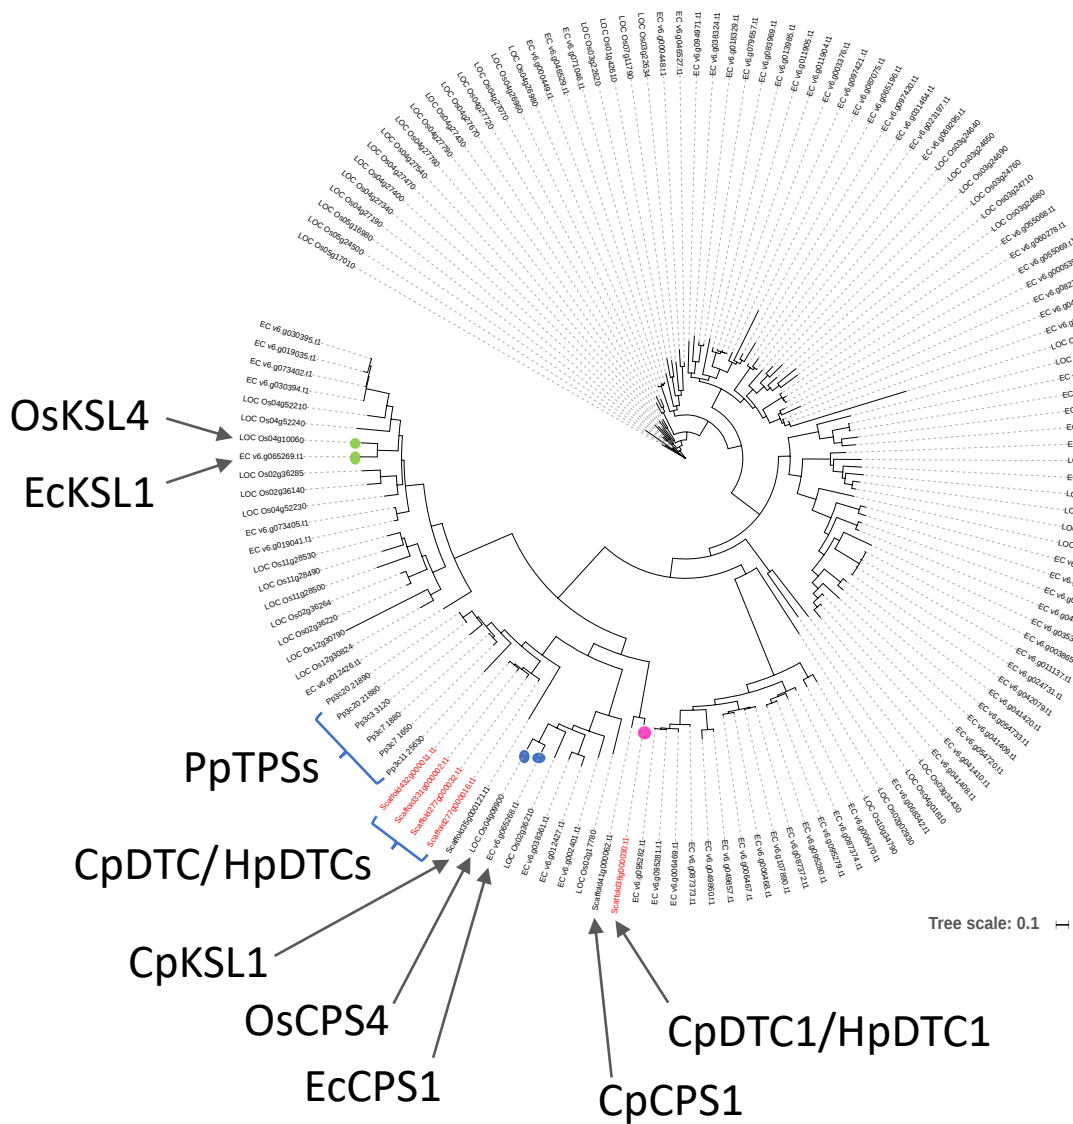

**SI Appendix Fig. S11.** Phylogenetic tree of terpene synthase genes from two mosses and two grasses. Four types of genes with different three functional motifs shown in figure S8 were included (e.g. DTC, DTC-like, CPS, KS have three, two and one motifs, respectively). CpDTC1/HpDTC1, OsCPS4, EcCPS4, OsKSL4, EcCPS4, CpDTC/HpDTC homologs, and PpTPS homologs are indicated.

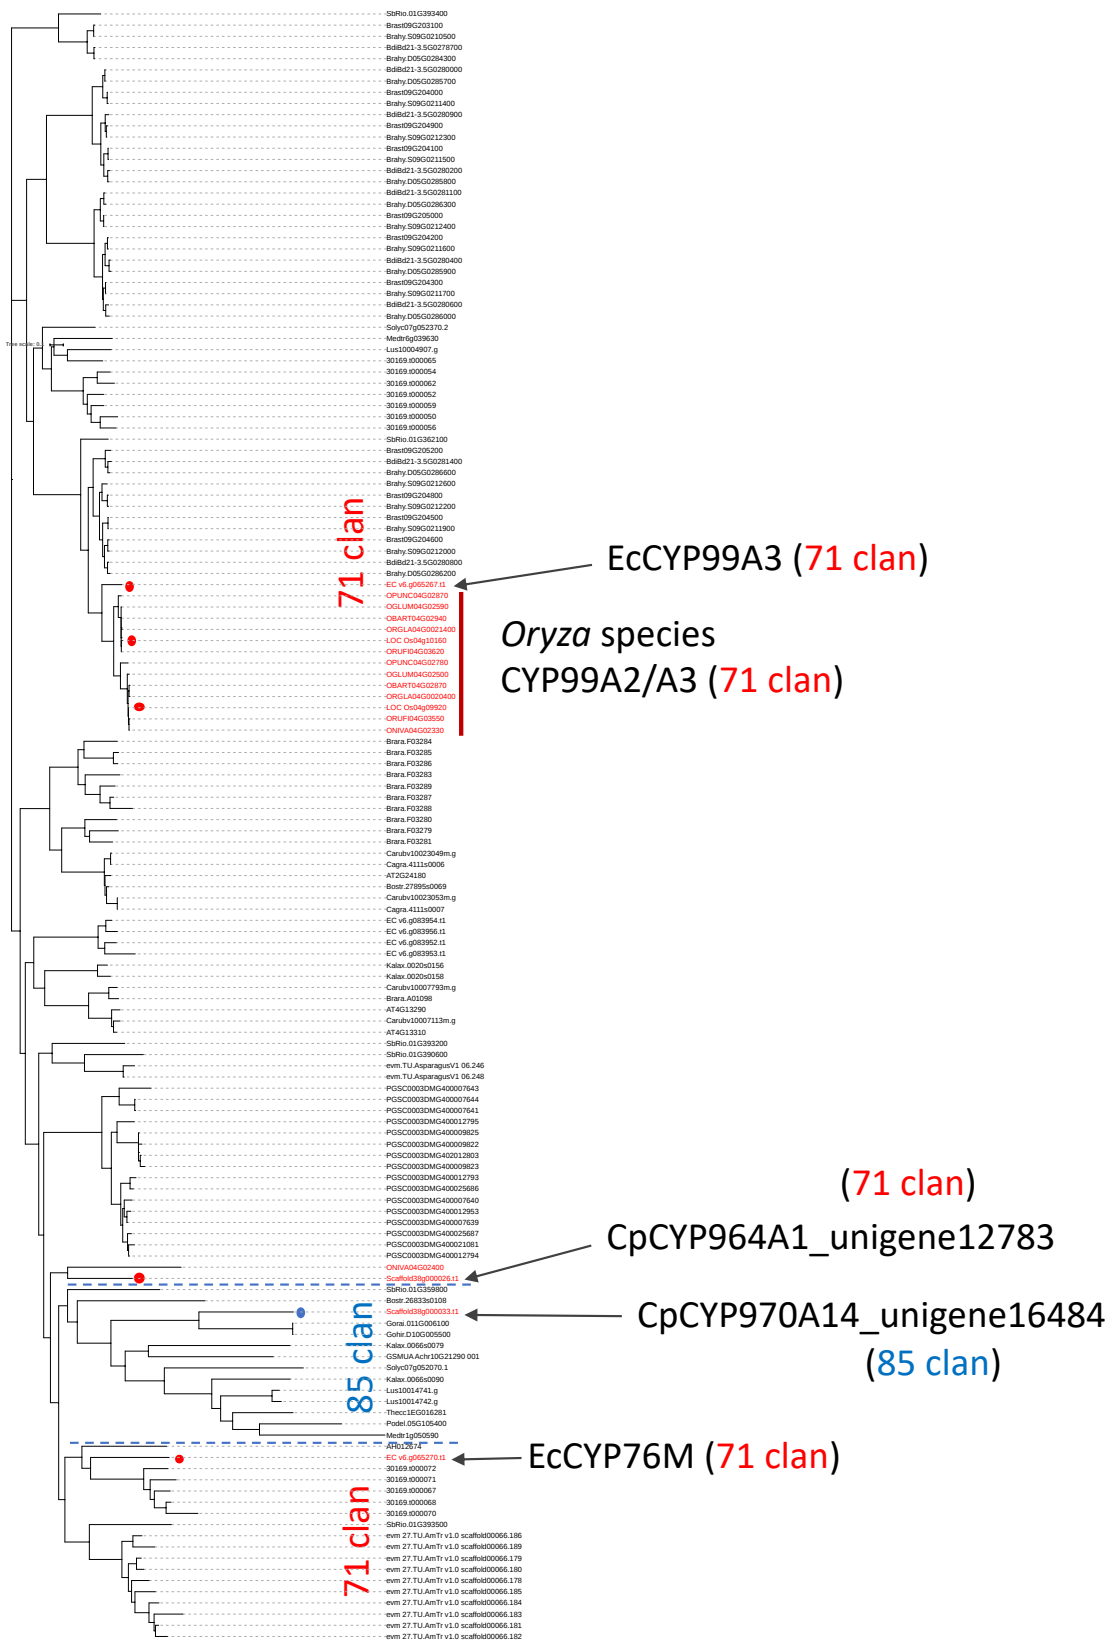

**SI Appendix Fig. S12.** Phylogenetic tree of CYP genes in 43 candidate gene cluster listed in supplementary table S7.



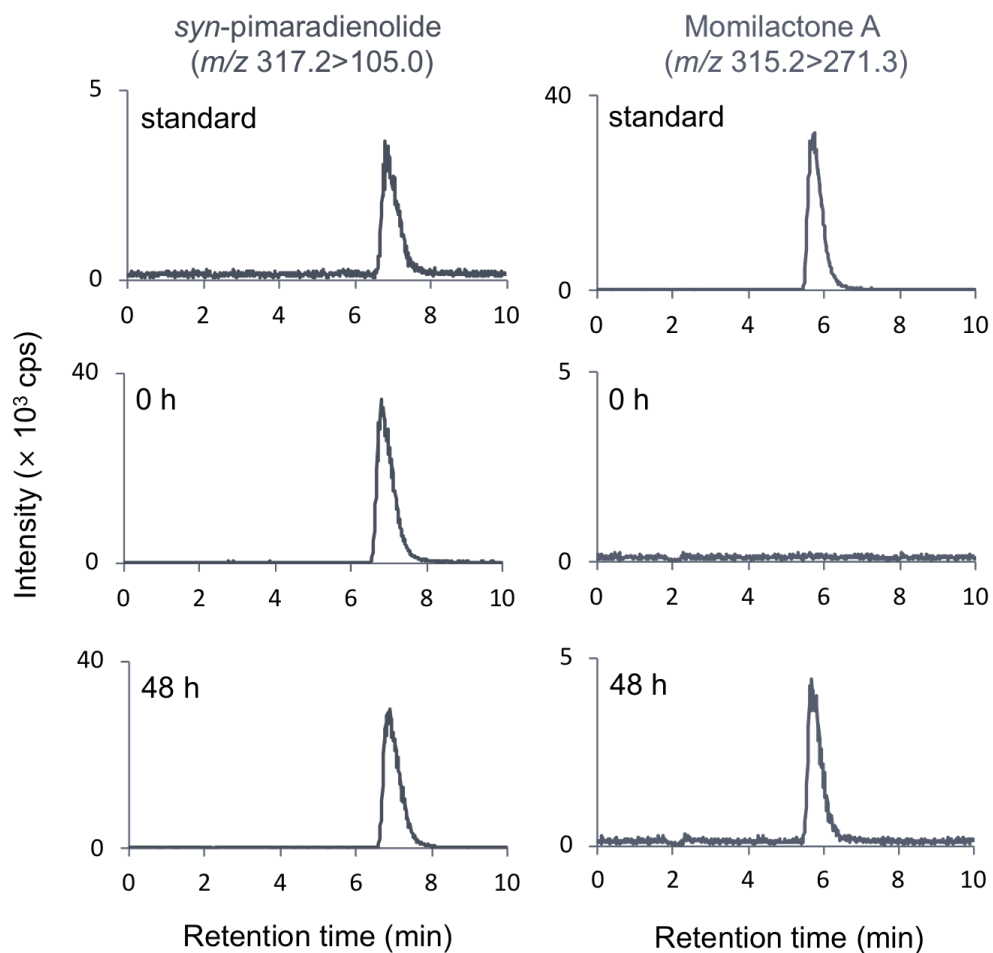

**SI Appendix Fig. S13.** Biotransformation of momilactone A from 3OH-syn-pimaradienolide in fission yeast. Yeast fed with 3OH-syn-pimaradienolide was further grown for 48 h. Metabolized product was extracted by ethyl acetate and analyzed by LC-MSMS.

**Table S1a Summary of the sequenced genomic data of *C. plumiforme***

| Type      | Libs  | Read length | Raw bases | Coverage |
|-----------|-------|-------------|-----------|----------|
| Pair-end  | 360bp | 90          | 29.4G     | 67.7     |
|           | 350bp | 90          | 33.4G     | 76.9     |
| Total     |       |             | ~62.8G    | ~145x    |
| Mate-pair | 10k   | 140         | 14G       | 32.3     |
|           | 20k   | 140         | 11.4G     | 26.3     |
| Total     |       | 75-150      | ~25.4G    | ~59x     |
| Total     |       |             | ~88.2G    | ~203x    |
| RSII      | 10k   | 5.26k       | ~1.54G    |          |
| Total     |       |             | ~1.54G    | ~3.5x    |

**Table S1b RNA-seq data information**

| Type    | Treatments           | Reads length | Total base |
|---------|----------------------|--------------|------------|
| RNA-seq | CuCl <sub>2</sub> 0h | 90           | ~2.4G      |
|         | CuCl <sub>2</sub> 8h | 90           | ~2.3G      |
| Total   |                      |              | ~4.7G      |

**SI Appendix Table S1. (a)** Summary of the sequenced genomic data of *C. plumiforme*. **(b)** RNA-seq data information

**Table S2 Summary of genome assembly of *C. plumiforme***

|                            | V1            | V2          | V3           | V4            | V5           |
|----------------------------|---------------|-------------|--------------|---------------|--------------|
| Scaffold length(Mb)        | 332.3 (76.1%) | 336 (77.3%) | 425.9(98.0%) | 332.1 (76.4%) | 335.0(77.0%) |
| Estimated genome size (Mb) | 434.4         | 434.4       | 434.4        | 434.4         | 434.4        |
| Scaffold N50 (bp)          | 94,597        | 193,269     | 6,450,362    | 784,076       | 790,020      |
| Contig length (Mb)         | 332.3         | 335.3       | 402.6        | 326.8         | 333.3        |
| Gap size (Mb)              | 0.1           | 0.7         | 23.3         | 5.3           | 1.7          |
| Contig N50 (bp)            | 92,913        | 173,015     | 24,050       | 110,463       | 224333       |

V1: Original assembly from MacroGen Japan  
V2: Original assembly with gap filling of Pacbio data  
V3: Pipeline1, NGS assembly with gap filling of Pacbio data  
V4: Pipeline2, Hybrid assembly of NGS and Pacbio data  
V5: Improved version based on V4

**SI Appendix Table S2.** Summary of genome assembly of *C. plumiforme*

**Table S3 V5 assembly results of all stages**

| Assembly stages | Genome size | Scaffold N50 | Contig N50 | Contig No. | Scaffold No. |
|-----------------|-------------|--------------|------------|------------|--------------|
| 1_MaSuRCA       | 332.06Mb    | 635.68Kb     | 110.46Kb   | 7,205      | 1,202        |
| 2_SSPACE        | 332.15Mb    | 784.08Kb     | 110.46Kb   | 7,201      | 1,043        |
| 3_Pbjelly       | 332.94Mb    | 784.08Kb     | 113.14Kb   | 7,025      | 1,042        |
| 4_GapFiller     | 334.36Mb    | 788.70Kb     | 162.13Kb   | 4,742      | 1,042        |
| 5_SSPACE        | 334.36Mb    | 788.70Kb     | 162.13Kb   | 4,742      | 1,040        |
| 6_Pbjelly       | 334.50Mb    | 788.70Kb     | 163.11Kb   | 4,712      | 1,040        |
| 7_GapFiller     | 335.23Mb    | 790.01Kb     | 197.03Kb   | 3,983      | 1,040        |
| 8_pilon         | 335.01Mb    | 790.02Kb     | 224.33Kb   | 3,474      | 1,040        |
| 9_merge         | 335.01Mb    | 790.02Kb     | 224.32Kb   | 3,474      | 1,040        |

*SI Appendix Table S3.* V5 assembly results of all stages

**Table S4 Summary of repeat annotation**

| Type of repeat elements | Length      | Number  | Percentage (%) |
|-------------------------|-------------|---------|----------------|
| SINES                   | 13,032      | 53      | 0.00           |
| LINEs                   | 3,215,244   | 7,253   | 0.96           |
| LTR elements            | 54,985,261  | 137,958 | 16.41          |
| DNA elements            | 13,342,737  | 25,481  | 3.98           |
| Unclassified            | 90,821,706  | 280,791 | 27.11          |
| total                   | 162,377,980 | 451,536 | 48.46          |

*SI Appendix Table S4.* Summary of repeat annotation

Table S5a Primer information

| Primers        | Primer sequences (5'-3')  |
|----------------|---------------------------|
| Forward primer | TGCAAGGATGATCAATCACTATAAG |
| Reverse primer | CAACTGACCAATAGTGCTATGGAA  |

PCR\_products and sequencing results

>Contig1

tgtaaacatgcctaagtcaaatgaacacatTTTTgtgctaggtgatgtcctctaaaattgtcatgattaacaagcaaaaaatgtccaaa  
 attcaagtaacatgcttaatttggactgttttttaacattacaacaacatggctttcaagctcccaaaattaccacataggaaattttt  
 catccaactgatgatgtggcatctgacgtgggtgggaaaaatgatgtggcaaccaaaaatgataacgtggcatgccatgtcaacaca  
 tttttgtgaaaatttttgataatttttcaaatgtaaattagacattaatataaacataccctgtccacaacacaaaaatatttataaaatagta  
 ctatttcaaaatataatataaaatataaaaaaaactcaaaaaatcctaaaatcaacaaaaagtaaaagaaaacttaccatctaccatc  
 aaaagaattttgatggcaaaaatgaaggaaatactcattaaaagataatgaaaatgaagaaaatgagcttctatatatacccaatcacaac  
 ccatggtgagacaaaagatagggataactagtttgggtacttgatactgtttatgttgacattattttgatgtcacatgtctatcfaatgttgca  
 ttttcttctgacatctgatgttcttttgacattctatacacaacatacttttgacaaaatccatagtgattgtctcccttctatcaaccatt  
 tgtataaagcctaactctttcattcattgtgcacatctatttcacccatttctttttacaaaagtaagccacatggtgccccttttctaaa  
 atttccaaaatgggcagcattttactataaataatataaattttataatttccaaaatggaaaataatctactgttgacgtggtgacatg  
 tttttggatattatcaaaacacaaactgtttttgaacatcattaaaacaaaatgtgcatagtgacatctacactaatttttacgattttg  
 caatgtcatalcaaatcacacttttgaaccgtcaattgttgaacatagtgacgttttagaaaacatgacacatttttaataacataccaa  
 aaacacagtttctatagtgatgactactgagaattatgtgaaa

Table S5b Primers for RT-qPCR

| Primers         | Primer sequences (5'-3') |
|-----------------|--------------------------|
| CpDTC-qPCR-F    | TGCTGCTCAGCATGTATCGT     |
| CpDTC-qPCR-R    | GGACTCTGGAACGCAAGACT     |
| CpMAS-qPCR-F    | ACCGCAGACGAAGCAGAATA     |
| CpMAS-qPCR-R    | CCTTTACATTCAGCCGAAGC     |
| CpCYP970-qPCR-F | CGGGAGATACTGAAGGTCCA     |
| CpCYP970-qPCR-R | CTCCGTAAGGCGAGAAGATG     |
| CpCYP964-qPCR-F | ATGTGCTAGATGCGCTGATG     |
| CpCYP964-qPCR-R | AGAGGTCTCATGGCCTGCTA     |
| CpACT3-qPCR-F   | CGAGCAGCATGAAGATCAAG     |
| CpACT3-qPCR-R   | GTACTIONGCTCTTCGCAATCC   |

**SI Appendix Table S5.** (a) Primer information and gap sequence of two scaffolds. (b) Primer information for qPCR.



| Table S7. Numbers of homolog genes for terpene synthase, CYP, and MAS in 107 plant species |                                                     |                                |                  |     |     |           |      |     |
|--------------------------------------------------------------------------------------------|-----------------------------------------------------|--------------------------------|------------------|-----|-----|-----------|------|-----|
| Species                                                                                    | Version                                             | Number of terpene related gene | DTC and DTC-like | CPS | KSL | Other TPS | P450 | Mas |
| Aquilegia coerulea                                                                         | Acoerulea_322_v3.1                                  | 76                             | 1                | 13  | 52  | 10        | 496  | 120 |
| Ananas comosus                                                                             | Acomosus_321_v3                                     | 21                             | 0                | 3   | 10  | 8         | 181  | 76  |
| Arabidopsis halleri                                                                        | Ahalleri_264_v1.1                                   | 25                             | 2                | 1   | 15  | 7         | 191  | 75  |
| Amaranthus hypochondriacus                                                                 | Ahypochondriacus_459_v2.1                           | 34                             | 1                | 1   | 14  | 18        | 200  | 68  |
| Arabidopsis lyrata                                                                         | Alyrata_384_v2.1                                    | 26                             | 2                | 1   | 12  | 11        | 241  | 87  |
| Anacardium occidentale                                                                     | Aoccidentale_449_v0.9                               | 86                             | 10               | 4   | 57  | 15        | 428  | 158 |
| Asparagus officinalis                                                                      | Aofficinalis_498_V1.1                               | 18                             | 0                | 4   | 10  | 4         | 177  | 71  |
| Arabidopsis thaliana                                                                       | Athaliana_167_TAIR10                                | 34                             | 5                | 1   | 24  | 4         | 248  | 91  |
| Amborella trichopoda                                                                       | Atrichopoda_291_v1.0                                | 38                             | 1                | 2   | 16  | 19        | 233  | 64  |
| Azolla filiculoides                                                                        | Azolla_filiculoides_v1.1                            | 1                              | 1                | 0   | 0   | 0         | 101  | 80  |
| Botryococcus braunii                                                                       | Bbraunii_502_v2.1                                   | 0                              | 0                | 0   | 0   | 0         | 92   | 66  |
| Brachypodium distachyon                                                                    | Bdistachyon_314_v3.1                                | 24                             | 5                | 1   | 16  | 2         | 264  | 86  |
| Beta vulgaris                                                                              | Beta_vulgaris.RefBeet-1.2.2                         | 20                             | 1                | 2   | 15  | 2         | 199  | 70  |
| Brachypodium hybridum                                                                      | Bhybridum_463_v1.1                                  | 45                             | 9                | 3   | 32  | 1         | 512  | 166 |
| Brassica oleracea capitata                                                                 | Boleraceacapitata_446_v1.0                          | 32                             | 0                | 2   | 20  | 10        | 274  | 101 |
| Brassica rapa                                                                              | BrapaFPsc_277_v1.3                                  | 35                             | 0                | 2   | 29  | 4         | 343  | 128 |
| Brachypodium stacei                                                                        | Bstacei_316_v1.1                                    | 22                             | 4                | 1   | 17  | 0         | 243  | 81  |
| Boechera stricta                                                                           | Bstricta_278_v1.2                                   | 26                             | 0                | 1   | 18  | 7         | 209  | 88  |
| Brachypodium sylvaticum                                                                    | Bsylvaticum_490_v1.1                                | 29                             | 5                | 2   | 19  | 3         | 260  | 89  |
| Cicer arietinum                                                                            | Carietinum_492_v1.0                                 | 23                             | 0                | 2   | 12  | 9         | 208  | 71  |
| Citrus clementina                                                                          | Cclementina_182_v1.0                                | 11                             | 0                | 2   | 8   | 1         | 339  | 92  |
| Capsella grandiflora                                                                       | Cgrandiflora_266_v1.1                               | 26                             | 0                | 1   | 19  | 6         | 208  | 73  |
| Chondrus crispus                                                                           | Chondrus_crispus.ASM35022v2                         | 0                              | 0                | 0   | 0   | 0         | 17   | 18  |
| Carica papaya                                                                              | Cpapaya_113_ASGPBv0.4                               | 31                             | 3                | 4   | 10  | 14        | 179  | 65  |
| Chenopodium quinoa                                                                         | Cquinoa_392_v1.0                                    | 62                             | 3                | 2   | 43  | 14        | 480  | 155 |
| Chlamydomonas reinhardtii                                                                  | Creinhardtii_281_v5.5                               | 0                              | 0                | 0   | 0   | 0         | 41   | 44  |
| Capsella rubella                                                                           | Crubella_183_v1.0                                   | 34                             | 1                | 1   | 28  | 4         | 237  | 84  |
| Cucumis sativus                                                                            | Csativus_122_v1.0                                   | 28                             | 1                | 1   | 21  | 5         | 222  | 78  |
| Citrus sinensis                                                                            | Csinensis_154_v1.1                                  | 66                             | 3                | 1   | 34  | 28        | 305  | 85  |
| Coccomyxa subellipsoidea                                                                   | CsubellipsoideaC_169_227_v2.0                       | 0                              | 0                | 0   | 0   | 0         | 27   | 48  |
| Cyanidioschyzon merolae                                                                    | Cyanidioschyzon_merolae.ASM9120v1                   | 0                              | 0                | 0   | 0   | 0         | 5    | 22  |
| Chromochloris zofingiensis                                                                 | Czofingiensis_461_v5.2.3.2                          | 0                              | 0                | 0   | 0   | 0         | 49   | 67  |
| Daucus carota                                                                              | Dcarota_388_v2.0                                    | 36                             | 1                | 3   | 23  | 9         | 312  | 115 |
| Dioscorea rotundata                                                                        | Dioscorea_rotundata.TDr96_F1_Pseudo_Chromosome_v1.0 | 17                             | 0                | 2   | 11  | 4         | 213  | 75  |
| Dunaliella salina                                                                          | Dsalina_325_v1.0                                    | 0                              | 0                | 0   | 0   | 0         | 30   | 45  |
| Echinochloa crus-galli                                                                     | Ecrus-galli_v6.prot                                 | 75                             | 2                | 2   | 42  | 29        | 900  | 295 |
| Eucalyptus grandis                                                                         | Egrandis_297_v2.0                                   | 99                             | 8                | 1   | 73  | 17        | 572  | 147 |
| Eutrema salsugineum                                                                        | Esalsugineum_173_v1.0                               | 18                             | 1                | 1   | 13  | 3         | 213  | 80  |
| Fragaria vesca                                                                             | Fvesca_226_v1.1                                     | 56                             | 8                | 6   | 28  | 14        | 292  | 77  |
| Galdieria sulphuraria                                                                      | Galdieria_sulphuraria.ASM34128v1                    | 0                              | 0                | 0   | 0   | 0         | 8    | 26  |
| Gossypium hirsutum                                                                         | Ghirsutum_458_v1.1                                  | 78                             | 6                | 5   | 63  | 4         | 653  | 209 |
| Glycine max                                                                                | Gmax_275_Wm82.a2.v1                                 | 36                             | 0                | 3   | 25  | 8         | 441  | 160 |
| Gossypium raimondii                                                                        | Graimondii_221_v2.1                                 | 69                             | 2                | 3   | 51  | 13        | 373  | 122 |
| Helianthus annuus                                                                          | Hannuus_494_r1.2                                    | 98                             | 0                | 6   | 76  | 16        | 604  | 177 |
| Calohydnium plumiforme                                                                     | Cplumiforme_V5                                      | 7                              | 5                | 1   | 1   | 0         | 150  | 93  |
| Hordeum vulgare                                                                            | Hvulgare_462_r1                                     | 39                             | 2                | 4   | 27  | 6         | 394  | 124 |
| Kalanchoe fedtschenkoi                                                                     | Kfedtschenkoi_382_v1.1                              | 45                             | 0                | 1   | 31  | 13        | 321  | 106 |
| Kalanchoe laxiflora                                                                        | Klaxiflora_309_v1.1                                 | 74                             | 1                | 2   | 60  | 11        | 526  | 177 |
| Leersia perrieri                                                                           | Leersia_perrieri.Lperri_V1.4                        | 31                             | 2                | 3   | 22  | 4         | 291  | 86  |
| Lactuca sativa                                                                             | Lsativa_467_v5                                      | 54                             | 0                | 1   | 42  | 11        | 426  | 148 |
| Lupinus angustifolius                                                                      | Lupinus_angustifolius.LupAngTanjil_v1.0             | 5                              | 0                | 0   | 4   | 1         | 90   | 40  |
| Linum usitatissimum                                                                        | Lusitatissimum_200_v1.0                             | 57                             | 6                | 3   | 31  | 17        | 436  | 194 |
| Musa acuminata                                                                             | Macuminata_304_v1                                   | 59                             | 3                | 1   | 32  | 23        | 238  | 94  |
| Malus domestica                                                                            | Mdomestica_196_v1.0                                 | 87                             | 4                | 10  | 35  | 38        | 596  | 186 |
| Manihot esculenta                                                                          | Mesculenta_305_v6.1                                 | 50                             | 0                | 2   | 40  | 8         | 342  | 121 |
| Mimulus guttatus                                                                           | Mguttatus_256_v2.0                                  | 57                             | 2                | 11  | 38  | 6         | 345  | 78  |
| Marchantia polymorpha                                                                      | Mpolymorpha_320_v3.1                                | 20                             | 3                | 2   | 3   | 12        | 148  | 46  |
| Micromonas pusilla                                                                         | MpusillaCCMP1545_228_v3.0                           | 0                              | 0                | 0   | 0   | 0         | 12   | 33  |

**SI Appendix Table S7.** Numbers of homolog genes for terpene synthase, CYP, and MAS in 107 plant species.

\*Also supplied as excel data.



| Table S7. Numbers of homolog genes for terpene synthase, CYP, and MAS in 107 plant species ( <i>continue</i> ) |                                            |                                |                  |          |          |           |           |           |
|----------------------------------------------------------------------------------------------------------------|--------------------------------------------|--------------------------------|------------------|----------|----------|-----------|-----------|-----------|
| Species                                                                                                        | Version                                    | Number of terpene related gene | DTC and DTC-like | CPS      | KSL      | Other TPS | P450      | Mas       |
| Chara braunii                                                                                                  | mRNA_Chbra_active_pep_20170414.tfa         | 0                              | 0                | 0        | 0        | 0         | 19        | 29        |
| Miscanthus sinensis                                                                                            | Msinensis_497_v7.1                         | 62                             | 2                | 2        | 45       | 13        | 600       | 211       |
| Micromonas                                                                                                     | MspRCC299_229_v3.0                         | 0                              | 0                | 0        | 0        | 0         | 12        | 41        |
| Medicago truncatula                                                                                            | Mtruncatula_285_Mt4.0v1                    | 48                             | 1                | 4        | 35       | 8         | 424       | 128       |
| Nicotiana attenuata                                                                                            | Nicotiana_attenuata.NIATTr2                | 50                             | 0                | 3        | 34       | 13        | 279       | 107       |
| Olea europaea                                                                                                  | Oeuropaea_451_v1.0                         | 75                             | 0                | 5        | 52       | 18        | 346       | 101       |
| Ostreococcus lucimarinus                                                                                       | Olucimarinus_231_v2.0                      | 0                              | 0                | 0        | 0        | 0         | 11        | 26        |
| Oryza barthii                                                                                                  | Oryza_barthii.O.barthii_v1                 | 55                             | 2                | 4        | 37       | 12        | 285       | 86        |
| Oryza brachyantha                                                                                              | Oryza_brachyantha.Oryza_brachyantha.v1.4b  | 32                             | 3                | 3        | 23       | 3         | 280       | 86        |
| Oryza glaberrima                                                                                               | Oryza_glaberrima.AG11.1                    | 42                             | 1                | 3        | 31       | 7         | 295       | 102       |
| Oryza glumaepatula                                                                                             | Oryza_glumaepatula.ALNU02000000            | 48                             | 5                | 3        | 31       | 9         | 321       | 86        |
| Oryza indica                                                                                                   | Oryza_indica.ASM465v1                      | 57                             | 3                | 3        | 35       | 16        | 399       | 144       |
| Oryza meridionalis                                                                                             | Oryza_meridionalis.Oryza_meridionalis_v1.3 | 39                             | 1                | 1        | 27       | 10        | 247       | 62        |
| Oryza nivara                                                                                                   | Oryza_nivara.AWHD00000000                  | 48                             | 4                | 3        | 33       | 8         | 309       | 91        |
| Oryza punctata                                                                                                 | Oryza_punctata.AVCL00000000                | 31                             | 2                | 2        | 21       | 6         | 270       | 83        |
| Oryza rufipogon                                                                                                | Oryza_rufipogon.OR_W1943                   | 48                             | 5                | 3        | 32       | 8         | 299       | 79        |
| Oryza sativa                                                                                                   | Osativa_323_v7.0                           | 53                             | 2                | 3        | 38       | 10        | 360       | 111       |
| Oropetium thomaeum                                                                                             | Othomaeum_386_v1.0                         | 13                             | 1                | 2        | 4        | 6         | 100       | 60        |
| Picea abies                                                                                                    | Pabies1.01.0                               | 56                             | 1                | 2        | 35       | 18        | 382       | 87        |
| Populus deltoides                                                                                              | PdeltoidesWV94_445_v2.1                    | 68                             | 1                | 2        | 50       | 15        | 432       | 137       |
| Panicum hallii                                                                                                 | Phalii_495_v3.1                            | 32                             | 2                | 4        | 24       | 2         | 285       | 95        |
| <b>Physcomitrella patens</b>                                                                                   | <b>Ppatens_318_v3.3</b>                    | <b>6</b>                       | <b>1</b>         | <b>1</b> | <b>2</b> | <b>2</b>  | <b>94</b> | <b>64</b> |
| Prunus persica                                                                                                 | Ppersica_298_v2.1                          | 44                             | 8                | 1        | 23       | 12        | 294       | 98        |
| Populus trichocarpa                                                                                            | Ptrichocarpa_444_v3.1                      | 60                             | 1                | 2        | 42       | 15        | 415       | 130       |
| Porphyra umbilicalis                                                                                           | Pumbilicalis_456_v1.5                      | 0                              | 0                | 0        | 0        | 0         | 14        | 33        |
| Panicum virgatum                                                                                               | Pvirgatum_450_v4.1                         | 125                            | 3                | 17       | 73       | 32        | 691       | 231       |
| Phaseolus vulgaris                                                                                             | Pvulgaris_442_v2.1                         | 38                             | 0                | 2        | 31       | 5         | 272       | 104       |
| Ricinus communis                                                                                               | Rcommunis_119_v0.1                         | 49                             | 2                | 1        | 31       | 15        | 265       | 148       |
| Sorghum bicolor                                                                                                | Sbicolor_454_v3.1.1                        | 43                             | 2                | 2        | 34       | 5         | 349       | 105       |
| Sphagnum fallax                                                                                                | Sfallax_310_v0.5                           | 6                              | 3                | 1        | 1        | 1         | 205       | 103       |
| Setaria italica                                                                                                | Sitalica_312_v2.2                          | 43                             | 3                | 5        | 29       | 6         | 363       | 109       |
| Solanum lycopersicum                                                                                           | Slycopersicum_390_ITAG2.4                  | 49                             | 0                | 1        | 35       | 13        | 255       | 104       |
| Selaginella moellendorffii                                                                                     | Smuellendorffii_91_v1.0                    | 25                             | 3                | 4        | 13       | 5         | 291       | 65        |
| Spirodela polyrhiza                                                                                            | Spolyrhiza_290_v2                          | 17                             | 0                | 2        | 5        | 10        | 152       | 70        |
| Salix purpurea                                                                                                 | Spurpurea_289_v1.0                         | 51                             | 6                | 2        | 35       | 8         | 363       | 127       |
| Solanum tuberosum                                                                                              | Stuberosum_448_v4.03                       | 77                             | 3                | 3        | 44       | 27        | 471       | 113       |
| Setaria viridis                                                                                                | Sviridis_500_v2.1                          | 47                             | 3                | 4        | 32       | 8         | 356       | 108       |
| Triticum aestivum                                                                                              | Taestivum_296_v2.2                         | 149                            | 2                | 18       | 84       | 45        | 1115      | 308       |
| Theobroma cacao                                                                                                | Tcacao_233_v1.1                            | 43                             | 1                | 1        | 30       | 11        | 296       | 86        |
| Trifolium pratense                                                                                             | Tpratense_385_v2                           | 41                             | 0                | 2        | 23       | 16        | 419       | 115       |
| Triticum dicoccoides                                                                                           | Triticum_dicoccoides.WEWSeg_v1.0           | 76                             | 1                | 8        | 48       | 19        | 819       | 222       |
| Volvox carteri                                                                                                 | Vcarteri_317_v2.1                          | 0                              | 0                | 0        | 0        | 0         | 18        | 37        |
| Vigna angularis                                                                                                | Vigna_angularis.Vigan1.1                   | 25                             | 0                | 2        | 21       | 2         | 256       | 109       |
| Vigna radiata                                                                                                  | Vigna_radiata.Vradiata_ver6                | 48                             | 0                | 1        | 40       | 7         | 305       | 155       |
| Vigna unguiculata                                                                                              | Vunguiculata_469_v1.1                      | 29                             | 0                | 2        | 26       | 1         | 301       | 127       |
| Vitis vinifera                                                                                                 | Vvinifera_145_Genoscope.12X                | 97                             | 8                | 4        | 44       | 41        | 319       | 102       |
| Zizania latifolia                                                                                              | Zlat_V1_protein                            | 34                             | 1                | 4        | 23       | 6         | 246       | 83        |
| Zostera marina                                                                                                 | Zmarina_324_v2.2                           | 2                              | 0                | 1        | 1        | 0         | 110       | 41        |
| Zea mays                                                                                                       | Zmays_284_Ensembl-18_2010-01-MaizeSequence | 36                             | 4                | 3        | 26       | 3         | 300       | 90        |

**SI Appendix Table S7.** Numbers of homolog genes for terpene synthase, CYP, and MAS in 107 plant species (*continue*). \*Also supplied as excel data

### SI Appendix References

1. A. V. Zimin *et al.*, Hybrid assembly of the large and highly repetitive genome of. *Genome Res* **27**, 787-792 (2017).
2. R. K. Patel, M. Jain, NGS QC Toolkit: a toolkit for quality control of next generation sequencing data. *PLoS One* **7**, e30619 (2012).
3. M. Boetzer, C. V. Henkel, H. J. Jansen, D. Butler, W. Pirovano, Scaffolding pre-assembled contigs using SSPACE. *Bioinformatics* **27**, 578-579 (2011).
4. A. C. English *et al.*, Mind the gap: upgrading genomes with Pacific Biosciences RS long-read sequencing technology. *PLoS One* **7**, e47768 (2012).
5. F. Nadalin, F. Vezzi, A. Policriti, GapFiller: a de novo assembly approach to fill the gap within paired reads. *BMC Bioinformatics*. **13** Suppl 14:S8 (2012).
6. B. J. Walker *et al.*, Pilon: an integrated tool for comprehensive microbial variant detection and genome assembly improvement. *PLoS One* **9**, e112963 (2014).
7. R. Luo *et al.*, SOAPdenovo2: an empirically improved memory-efficient short-read de novo assembler. *Gigascience* **1**, 18 (2012).
8. M. Tarailo-Graovac, N. Chen, Using RepeatMasker to identify repetitive elements in genomic sequences. *Curr Protoc Bioinformatics* Chapter 4:Unit 4.10. (2009).
9. M. Stanke *et al.*, AUGUSTUS: ab initio prediction of alternative transcripts. *Nucleic Acids Res* **34**:W435-439 (2006).
10. A. V. Lukashin, M. Borodovsky, GeneMark.hmm: new solutions for gene finding. *Nucleic Acids Res* **26**:1107-1115 (1998).
11. A. A. Salamov, V. V. Solovyev, Ab initio gene finding in Drosophila genomic DNA. *Genome Res* **10**:516-522 (2000).
12. T. D. Wu, C. K. Watanabe, GMAP: a genomic mapping and alignment program for mRNA and EST sequences. *Bioinformatics* **21**:1859-1875. (2005).
13. C. Trapnell, L. Pachter, S. L. Salzberg, TopHat: discovering splice junctions with RNA-Seq. *Bioinformatics* **25**, 1105-1111 (2009).
14. C. Trapnell *et al.*, Transcript assembly and quantification by RNA-Seq reveals unannotated transcripts and isoform switching during cell differentiation. *Nat Biotechnol.* May;28(5):511-515 (2010).
15. M. G. Grabherr *et al.*, Full-length transcriptome assembly from RNA-Seq data without a reference genome. *Nat Biotechnol* **29**, 644-652 (2011).
16. B. J. Haas *et al.*, Improving the Arabidopsis genome annotation using maximal transcript alignment assemblies. *Nucleic Acids Res* **31**, 5654-5666 (2003).
17. A. Rambaut, FigTree v1. 4.2. A graphical viewer of phylogenetic trees. Institute of Evolutionary Biology University of Edinburgh. (2014).
18. D. Wang, Y. Zhang, Z. Zhang, J. Zhu, J. Yu, KaKs\_Calculator 2.0: a toolkit incorporating gamma-series methods and sliding window strategies. *Genomics Proteomics Bioinformatics*. **8**(1):77-80. (2010).

19. H. Wickham, ggplot2[J]. *Wiley Interdisciplinary Reviews Computational Statistics*, 3(2):180-185 (2015).
20. L. Guo, *et al.*, A host plant genome (*Zizania latifolia*) after a century-long endophyte infection. *Plant J.* **83**(4):600-609 (2015).
21. S. Miyazaki, T. Katsumata, M. Natsume, H. Kawaide, The CYP701B1 of *Physcomitrella patens* is an *ent*-kaurene oxidase that resists inhibition by uniconazole-P. *FEBS Lett.* **585**(12):1879-1883 (2011)
22. Y. Sawada, *et al.*, Germination of photoblastic lettuce seeds is regulated via the control of endogenous physiologically active gibberellin content, rather than of gibberellin responsiveness. *J. Exp. Bot.* **59**, 3383–3393 (2008)
23. S. Miyazaki *et al.*, Analysis of *ent*-kaurenoic acid by ultra-performance liquid chromatography-tandem mass spectrometry. *Biochem Biophys Rep.* **2**, 103-107 (2015)
